# Supplementary material for: Biomimetic Robust Starch Composite Films with Super-Hydrophobicity and Vivid Structural Colors
Source: MDPI journal article supplement (doi:10.3390/ijms23105607), 2022-05-17
Supplement: s1 [file s1]

# **Biomimetic Robust Starch Composite Films with Super-hydrophobicity and Vivid Structural Colors**

Yateng Wang <sup>a,b</sup>, Jianru Fan <sup>a</sup>, Hao Zhao <sup>a</sup>, Xiaoming Song <sup>a</sup>, Zhe Ji <sup>a</sup>, Congxia Xie <sup>a</sup>, Fushan Chen <sup>a</sup>, Yao Meng <sup>a, b, c\*</sup>

<sup>a</sup>. College of Marine Science and Biological Engineering, College of Chemistry and Molecular Engineering, Eco-chemical Engineering Cooperative Innovation Center of Shandong, Qingdao University of Science & Technology, Qingdao 266042, PR China

<sup>b</sup> Key Laboratory of Pulp and Paper Science & Technology of Ministry of Education, Qilu University of Technology (Shandong Academy of Sciences), Jinan, 250353

<sup>c</sup>. State Key Laboratory of Fine Chemicals, Dalian University of Technology, Dalian 116024, PR China

\* Corresponding author.

E-mail addresses: [mengyao@qust.edu.cn](mailto:mengyao@qust.edu.cn), Qingdao University of Science & Technology, 53# Zhengzhou Rd, Qingdao 266042, PR China.

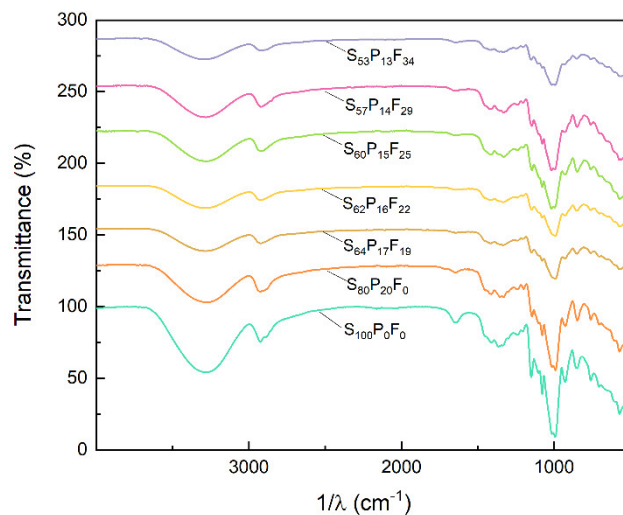

**Figure S1.** FT-IR spectra of starch-PVA-fiber composite films with different fiber content

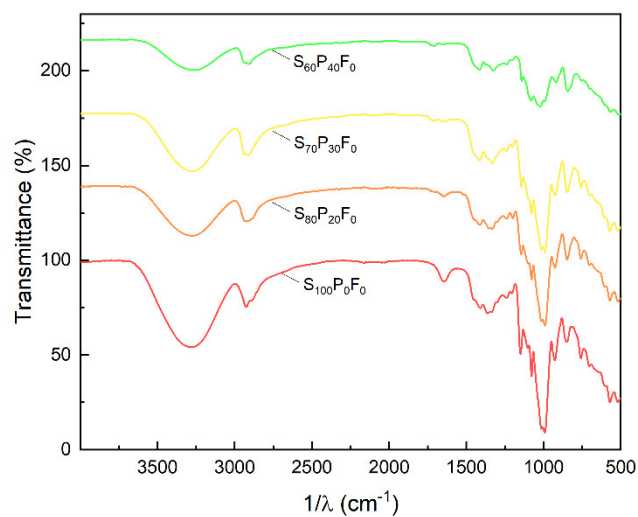

**Figure S2.** FT-IR spectra of starch-PVA composite films with different PVA content

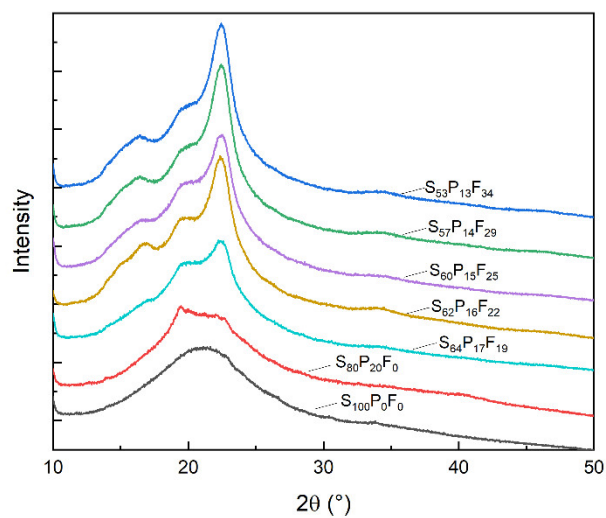

**Figure S3.** XRD spectra of starch-PVA-fiber composite films with different fiber content

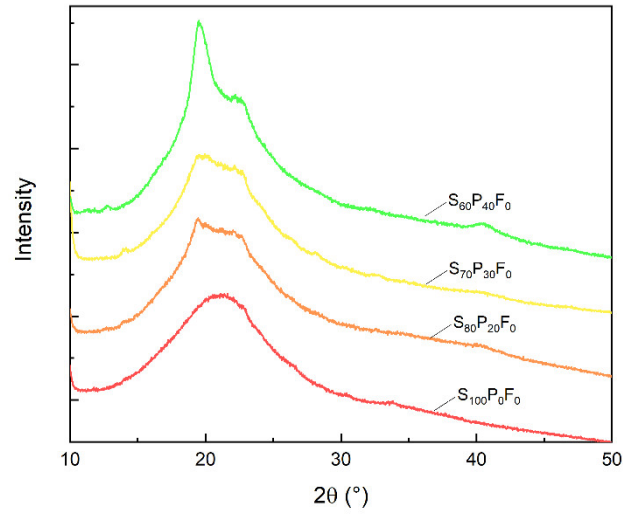

**Figure S4.** XRD spectra of starch-PVA composite films with different PVA content

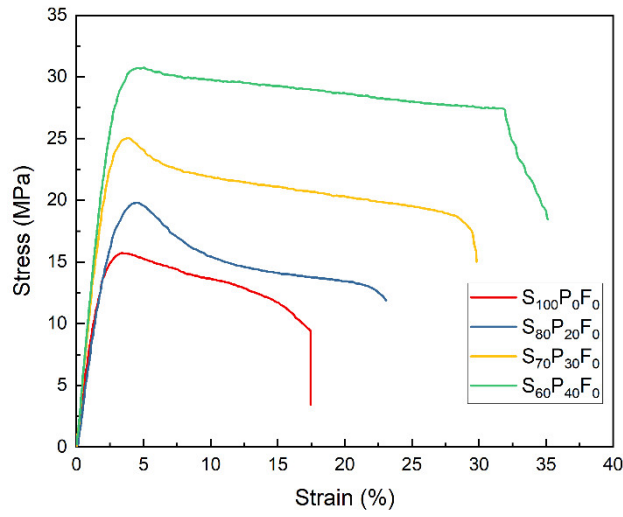

**Figure S5.** Stress-strain curves of starch-PVA composite films with different PVA content

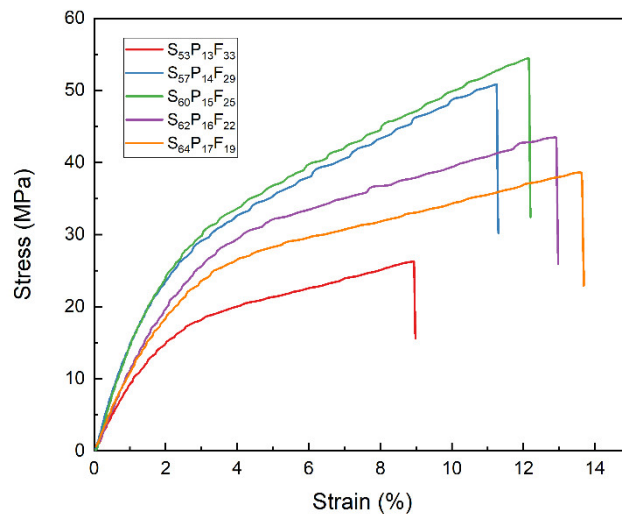

**Figure S6.** Stress-strain curves of starch-PVA-fiber composite films with different fiber content

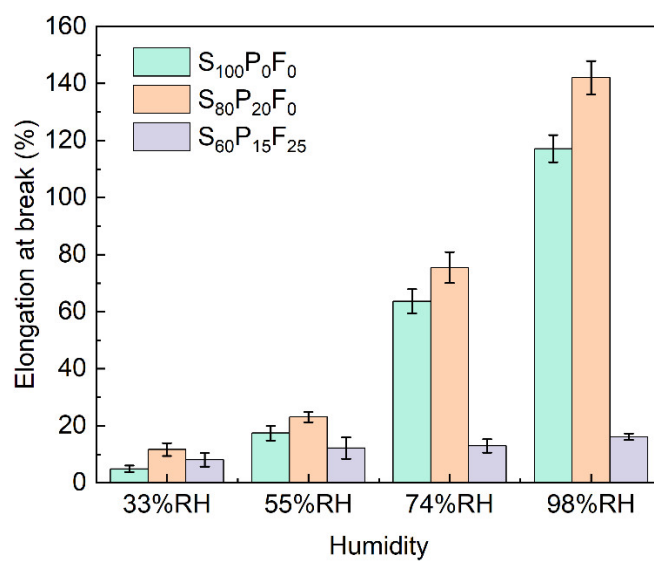

**Figure S7.** The elongation at break of composite films under different humidity

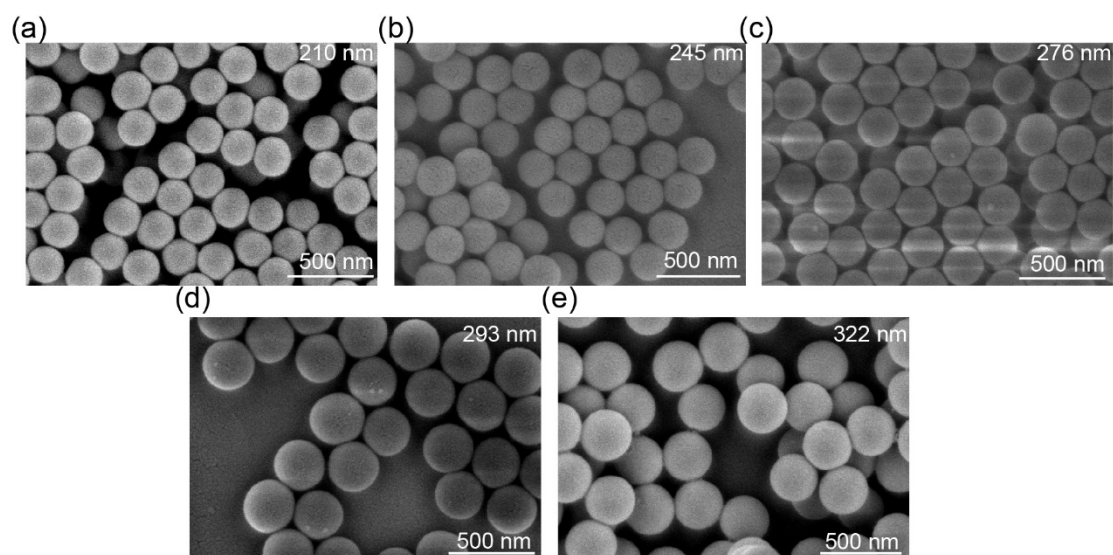

**Figure S8.** The monodispersed SiO<sub>2</sub> nanoparticles with diameters of (a) 210 nm, (b) 245 nm, (c) 276 nm, (d) 293 nm and (e) 322 nm, respectively.

**Table S1.** Diameters and Zeta-potential of Six Silica Nanospheres Samples

| Sample | NH <sub>3</sub> ·H <sub>2</sub> O Dosage (mL) | Size (nm) | PDI   | Zeta Potential (mV) |
|--------|-----------------------------------------------|-----------|-------|---------------------|
| (a)    | 5                                             | 210       | 0.037 | -33.8               |
| (b)    | 10                                            | 245       | 0.026 | -31.1               |
| (c)    | 15                                            | 276       | 0.019 | -35.3               |
| (d)    | 20                                            | 293       | 0.030 | -39.3               |
| (e)    | 25                                            | 322       | 0.041 | -42.6               |

**Table S2.** Coding nformation and formulation of composite films

| Code                                            | Starch (o.d.) / g | PVA (o.d.) / g | Fiber (o.d.) / g | Glycerol (o.d.) <sup>a</sup> / g |
|-------------------------------------------------|-------------------|----------------|------------------|----------------------------------|
| S <sub>100</sub> P <sub>0</sub> F <sub>0</sub>  | 10.00             | 0              | 0                | 2.00                             |
| S <sub>80</sub> P <sub>20</sub> F <sub>0</sub>  | 8.00              | 2.00           | 0                | 1.60                             |
| S <sub>70</sub> P <sub>30</sub> F <sub>0</sub>  | 7.00              | 3.00           | 0                | 1.40                             |
| S <sub>60</sub> P <sub>40</sub> F <sub>0</sub>  | 6.00              | 4.00           | 0                | 1.20                             |
| S <sub>64</sub> P <sub>17</sub> F <sub>19</sub> | 6.40              | 1.70           | 1.90             | 1.28                             |
| S <sub>62</sub> P <sub>16</sub> F <sub>22</sub> | 6.20              | 1.60           | 2.20             | 1.24                             |
| S <sub>60</sub> P <sub>15</sub> F <sub>25</sub> | 6.00              | 1.50           | 2.50             | 1.20                             |
| S <sub>57</sub> P <sub>14</sub> F <sub>29</sub> | 5.70              | 1.40           | 2.90             | 1.14                             |
| S <sub>53</sub> P <sub>13</sub> F <sub>34</sub> | 5.30              | 1.30           | 3.40             | 1.06                             |
| S <sub>52</sub> P <sub>23</sub> F <sub>25</sub> | 5.20              | 2.30           | 2.50             | 1.04                             |
| S <sub>45</sub> P <sub>30</sub> F <sub>25</sub> | 4.50              | 3.00           | 2.50             | 0.90                             |

a: the addition of glycerol was based on mass (o.d.) of potato starch.

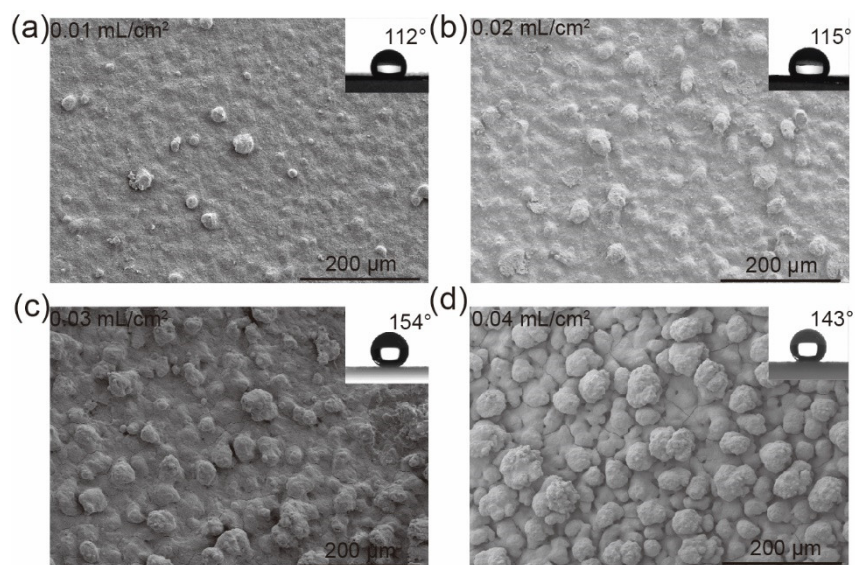

**Figure S9.** The surface morphology and CAs changes of the SPF films with different spraying quantity of SiO<sub>2</sub>/ethanol dispersion.

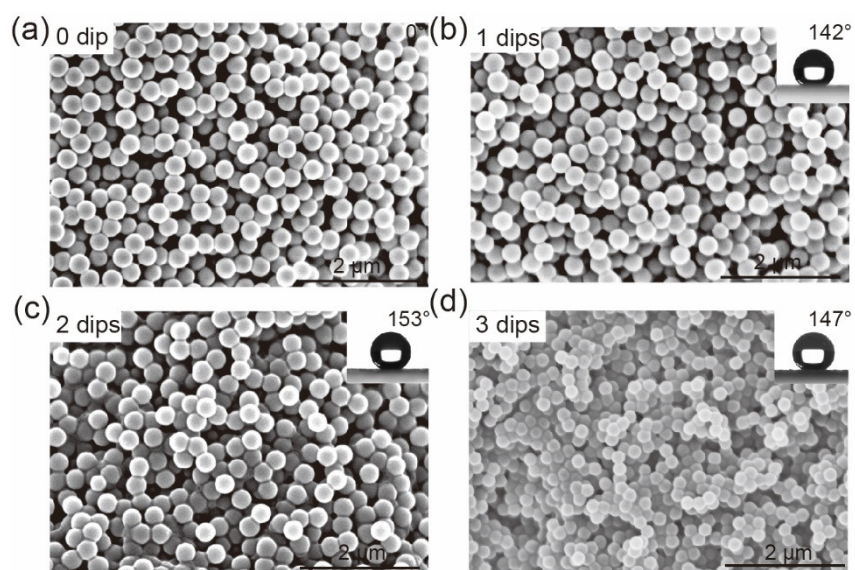

**Figure S10.** The surface morphology and CAs changes of the SPF films with different dipping times in PDMS/n-hexane dispersion.

The video of the dripping water was listed in Video S1.
